# Supplementary material for: Rapid and selective detection of aluminum ion using 1,2,3-triazole-4,5-dicarboxylic acid-functionalized gold nanoparticle-based colorimetric sensor
Source: Royal Society of Chemistry journal article supplement (doi:10.1039/d1ra04834a), 2021-01-01
Supplement: d1ra04834a1.pdf [file d1ra04834a1.pdf]

## Electronic Supplementary Information (ESI)

### **Rapid and selective detection of aluminum ion using 1,2,3-triazole-4,5-dicarboxylic acid-functionalized gold nanoparticle-based colorimetric sensor**

Shengliang Zhao,<sup>a, b</sup> Liqiong Chen,<sup>\*a, c</sup> Feiyan Liu,<sup>a</sup> Yongyao Fan,<sup>a</sup> Yiheng Liu,<sup>a</sup>  
Yulai Han,<sup>a</sup> Yunfei Hu,<sup>a</sup> Jingyun Su<sup>a</sup> and Chunyan Song<sup>c</sup>

<sup>a</sup> College of New Materials and New Energies, Shenzhen Technology University, Shenzhen, Guangdong Province, China

<sup>b</sup> College of Applied Technology, Shenzhen University, Shenzhen, Nanshan District, Guangdong Province, China

<sup>c</sup> Analysis and Testing Center, Shenzhen Technology University, Pingshan District, Shenzhen, Guangdong Province, China

\* Corresponding author, E-mail address: [chenliqiong@sztu.edu.cn](mailto:chenliqiong@sztu.edu.cn)

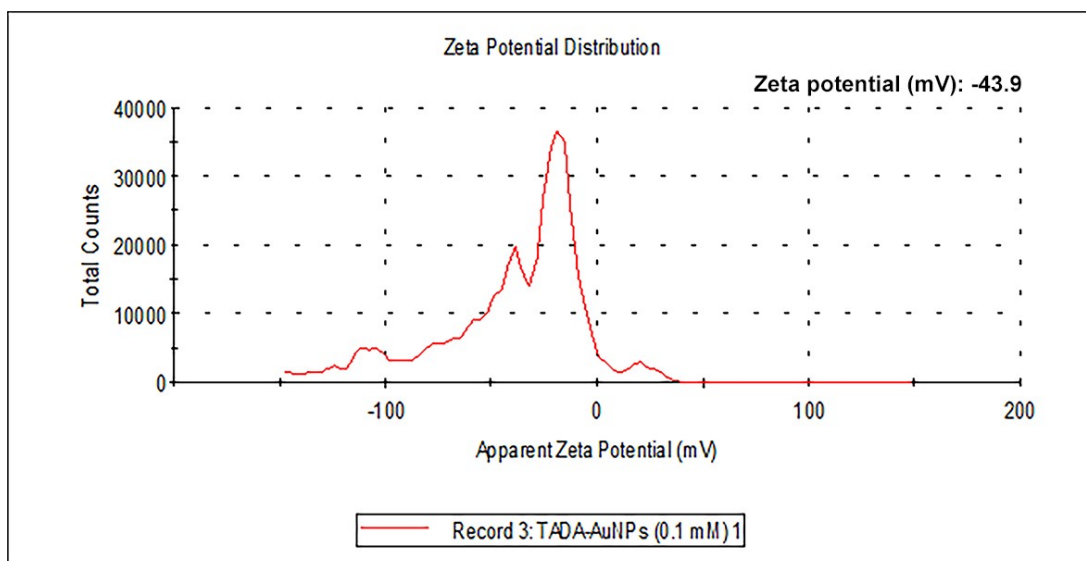

**Fig. S1** Zeta potential diagram of TADA-AuNPs (0.1 mM) when pH=6.3.

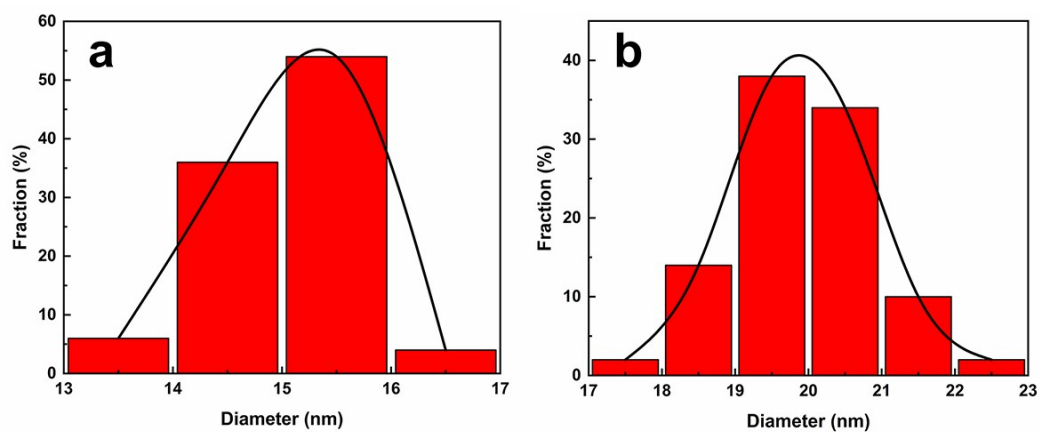

**Fig. S2** TEM particle size distribution diagram of TADA-AuNPs with Na<sub>3</sub>Ct/HAuCl<sub>4</sub> molar ratios of 6.4:1 and 12.8:1 (50 particles are randomly selected for measurement).

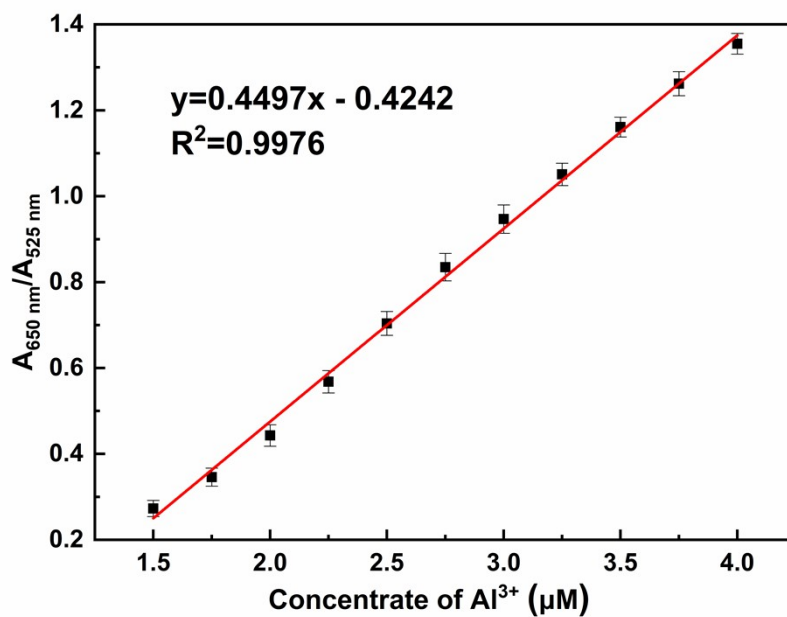

**Fig. S3** The standard curve line of TADA-AuNPs in presence of different concentrations of  $Al^{3+}$  (1.5-4.0  $\mu M$ ). The detection limit (DL) of  $Al^{3+}$  by TADA-AuNPs was determined from the following equation:  $DL = 3\sigma/S$ ,  $\sigma$  is the standard deviation of the blank solution,  $S$  is the slope of the standard curve line.  $DL = 3 \times 0.002249 / 0.4497 = 15\text{ nM}$ .

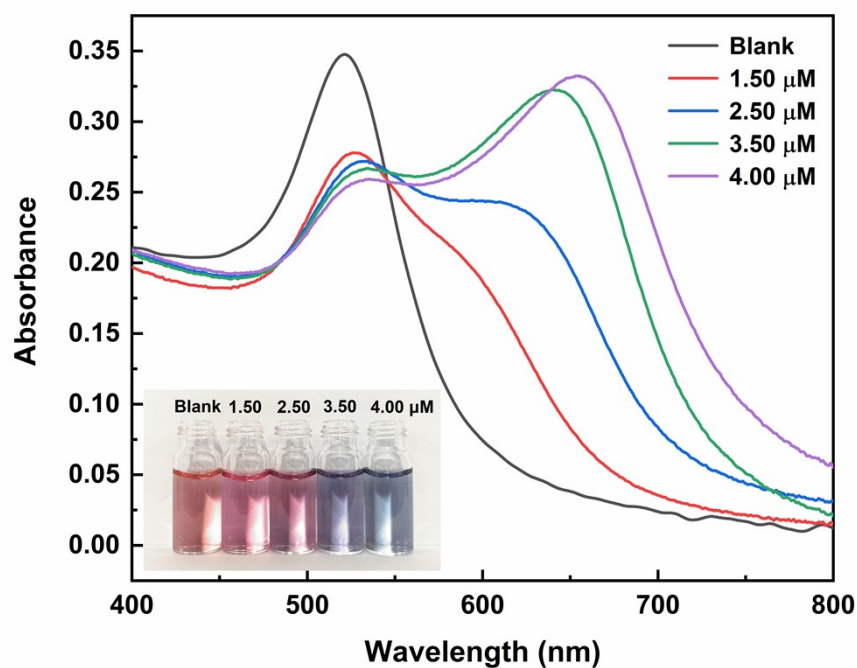

**Fig. S4** UV-Vis spectrum and photo (inset) of actual river water sample spiked with  $Al^{3+}$  (1.50, 2.50, 3.50, 4.00  $\mu M$ ) detection.
